# Supplementary material
Source: MDPI journal article supplement (https://www.mdpi.com/2673-4591/57/1/27)
Supplement: s1 [file s1]

**Table S1:** Medium risk level and corrective measures.

| Hazardous event                                                                                              | Consequence and categories | Uncertainty of consequence | Evaluation without control existence |                      |            | Determination of corrective measures                                                                                                                                                                          |                                                                                             | Control measures                                                                                       |
|--------------------------------------------------------------------------------------------------------------|----------------------------|----------------------------|--------------------------------------|----------------------|------------|---------------------------------------------------------------------------------------------------------------------------------------------------------------------------------------------------------------|---------------------------------------------------------------------------------------------|--------------------------------------------------------------------------------------------------------|
|                                                                                                              |                            |                            | Probability                          | Consequences/Impacts | Risk level | Operational                                                                                                                                                                                                   | Technical                                                                                   |                                                                                                        |
| Raw water intake by pumping – Mladoňov, Luže a Pod Lesem.                                                    |                            |                            |                                      |                      |            |                                                                                                                                                                                                               |                                                                                             |                                                                                                        |
| Danger of contamination seeping from agricultural activities on the surface water                            | A                          | PRO                        | B-PRA                                | 3, S                 | Medium     | Contact with farmers, visual inspection                                                                                                                                                                       | Installation of water treatment, such as filtration through activated carbon                | Raw water quality control                                                                              |
| Missing second-level buffer zone, agricultural activity - contamination of the water source with pesticides. | A                          | NJ                         | B-VZ                                 | 3,S                  | Medium     | Establishment of the second protective zone, assessment of the impact of inappropriate activities on the quality of the source (analysis results, hydrogeological assessment), contacting the managing farmer | Non-use of contaminated sources or the introduction of water treatment technology           | More frequent monitoring of already identified parameters                                              |
| Water accumulation - water reservoir and water treatment with chlorination                                   |                            |                            |                                      |                      |            |                                                                                                                                                                                                               |                                                                                             |                                                                                                        |
| Poor condition of the ventilation system on the water reservoir                                              | A                          | PRO                        | C-MPR                                | 3, S                 | Medium     | Cleaning tanks, increasing chlorination when necessary, inspecting outdoor openings and entrances                                                                                                             | Installation of new air conditioning , windows, window screens, and air duct modifications. | Regular microbiological water testing                                                                  |
| Exceeding the prescribed disinfectant dosage                                                                 | A                          | PRO                        | C-MPR                                | 3,S                  | Medium     | Chlorine network monitoring. Checking the pulse meter on the chlorinator with the number on the PLC                                                                                                           | New chlorinator (VDJ 40). Possible purchase of a device for continuous chlorine measurement | Water inspection in accordance with operational regulations or as per consultation with the laboratory |

|                                             |      |     |       |      |        |                                                                                                                              |                                                             |                                                                                                           |
|---------------------------------------------|------|-----|-------|------|--------|------------------------------------------------------------------------------------------------------------------------------|-------------------------------------------------------------|-----------------------------------------------------------------------------------------------------------|
|                                             |      |     |       |      |        |                                                                                                                              | nt in the network.                                          |                                                                                                           |
| Distribution system and pressure regulation |      |     |       |      |        |                                                                                                                              |                                                             |                                                                                                           |
| Water pipeline malfunction, water leak      | A +B | PRO | C-MPR | 3, S | Medium | Monitoring and data statistics on the central PLC, construction, and repairs of pipelines according to applicable standards. | Ensuring contingency supply. Adhering to the recovery plan. | Extraordinary laboratory analysis. Provide the fault number on the website for citizens to report faults. |
